# Supplementary material
Source: PubMed Central journal article supplement (PMC3645592)
Supplement: 1221022110_pnas.201221022SI.pdf [file 1221022110_pnas.201221022SI.pdf]

# Supporting Information

Weisbrod et al. 10.1073/pnas.1221022110

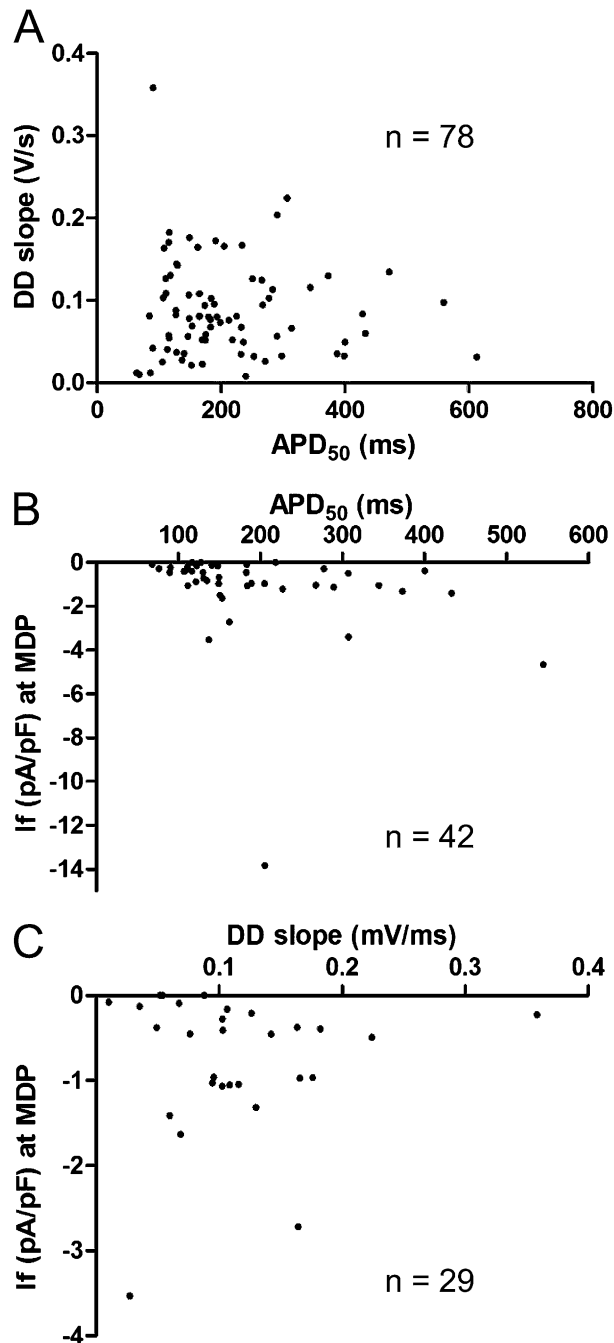

**Fig. S1.** Lack of correlation in the relations between the AP duration at 50% repolarization ( $APD_{50}$ ), the diastolic depolarization (DD) slope, and funny current ( $I_f$ ) current density. (A) No correlation was found between the DD slope and  $APD_{50}$  ( $r = -0.055$ ,  $P = 0.628$ ,  $n = 78$ ). (B) No correlation was found between the  $I_f$  current density measured at MDP and  $APD_{50}$  ( $r = -0.239$ ,  $P = 0.127$ ,  $n = 42$ ). (C) No correlation was found between the  $I_f$  current density measured at MDP and the DD slope ( $r = 0.065$ ,  $P = 0.736$ ,  $n = 29$ ).



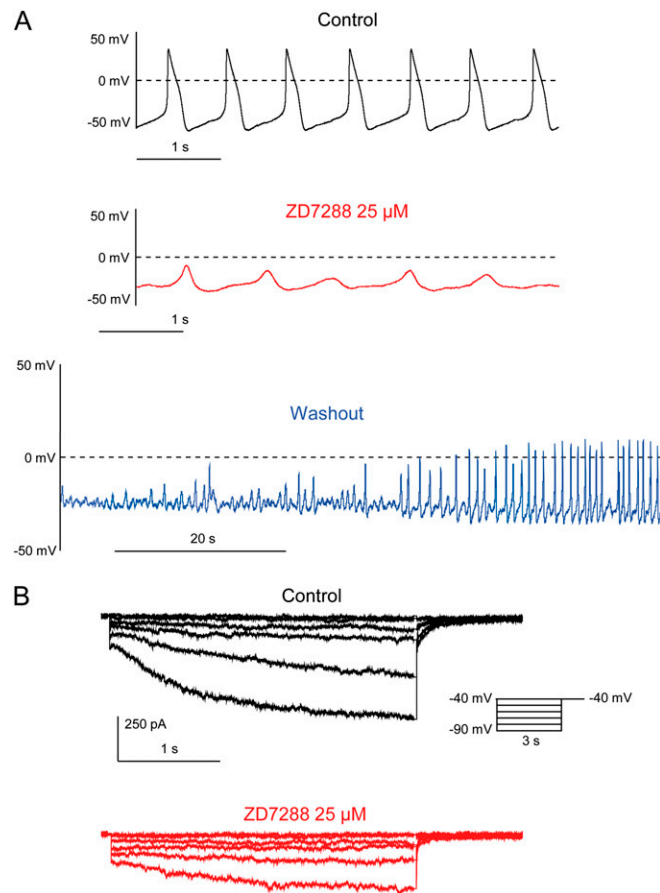

**Fig. S3.** A subset of hESC-CMs with prominent  $I_f$ -dependent pacemaker are sensitive to ZD7288. (*A* and *B*) Combined current- and voltage-clamp recordings were performed in the same cell. (*A, Top*) Spontaneous action potential (AP) pattern of an hESC-CM recorded under current-clamp in control conditions (black trace). (*B*) The  $I_f$  current was subsequently recorded in the same cell, under voltage-clamp, in the absence (black traces) and presence of 25  $\mu$ M ZD7288 (red traces) by stepping the membrane from a holding potential of  $-40$  mV to  $-90$  mV in 10-mV decrements for 3 s pulse duration. Once  $I_f$  current inhibition by ZD7288 was monitored under voltage-clamp, the AP pattern of the same cell was examined under current-clamp, during continuous ZD7288 exposure (see *A, Middle* red trace). Note the complete suppression of the pacemaker activity. The same cell was washed out and partially recovered its pacemaker activity (see *A, Bottom* blue trace).



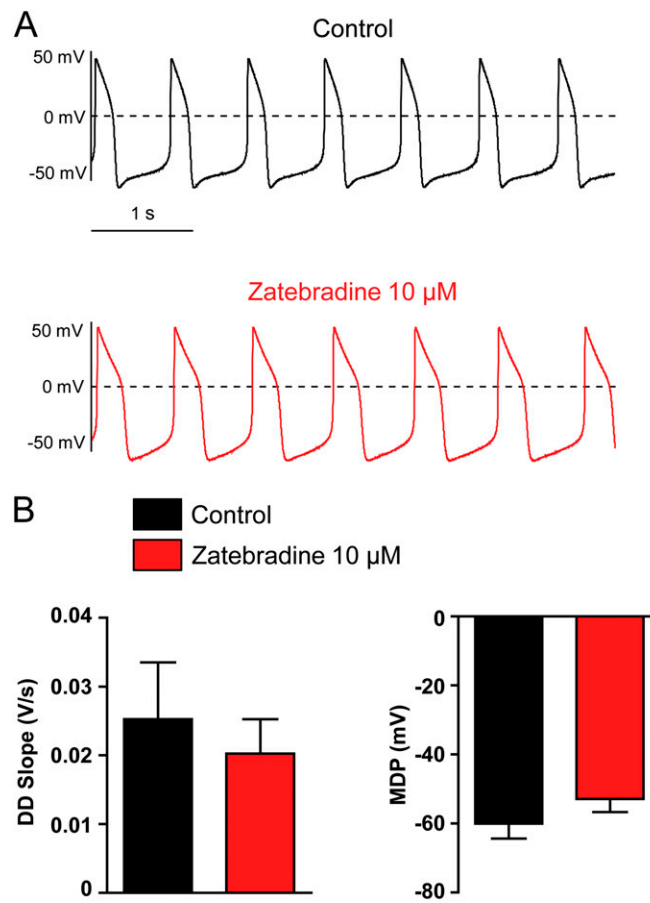

**Fig. S5.** A subset of hESC-CMs with prominent  $I_f$ -independent pacemaker is insensitive to zatebradine. (A) Spontaneous AP pattern of an hESC-CM recorded under current-clamp before (control, black trace) and following treatment with 10  $\mu$ M zatebradine (red trace). (B) Zatebradine (10  $\mu$ M) affects neither the DD Slope nor the maximal diastolic potential (MDP) in this group of hESC-CMs ( $n = 4$ ).

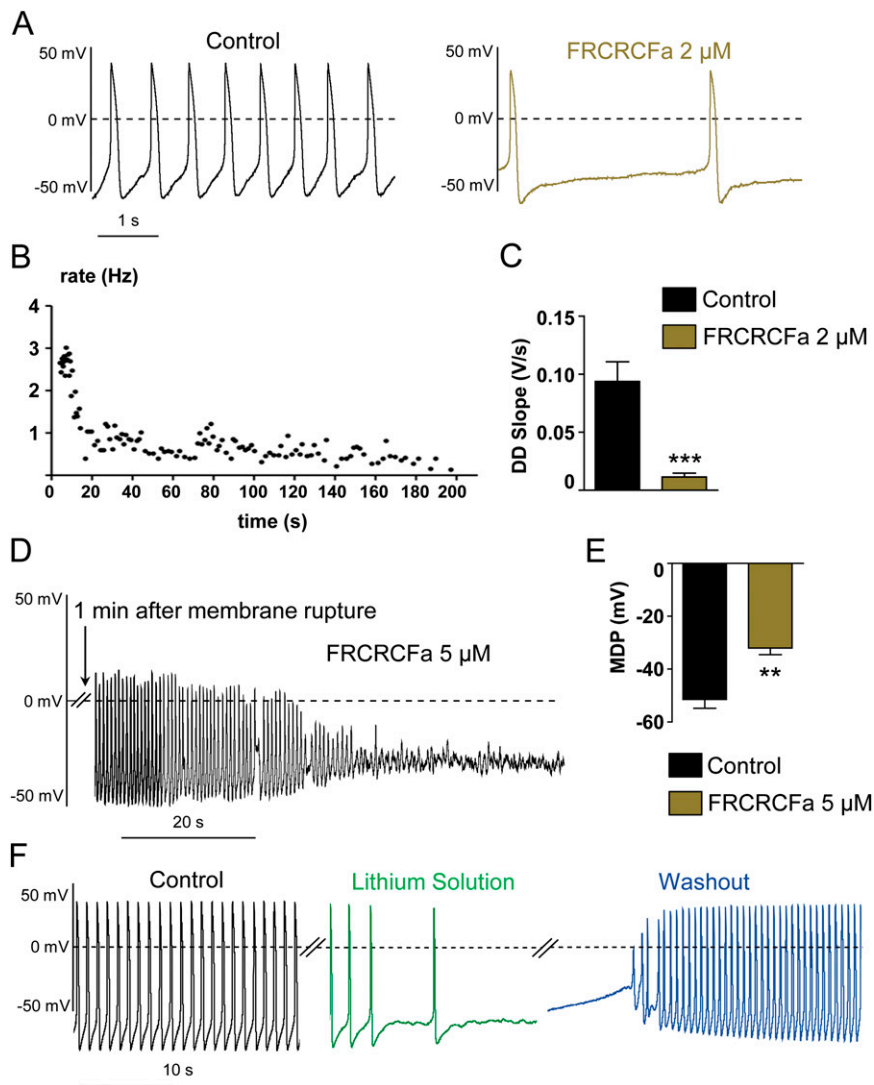

**Fig. S6.** A subset of hESC-CMs exhibits a pacemaker prominently sensitive to the  $\text{Na}^+$ - $\text{Ca}^{2+}$  exchanger (NCX) blocker Phe-Arg-Cys-Arg-Cys-Phe-CONH<sub>2</sub> (FRCRCFa). (A) Spontaneous AP pattern of an hESC-CM recorded under current-clamp before (control, black trace) and following treatment with 2  $\mu$ M FRCRCFa (brown trace). Note, the bradycardia and the decrease in the late DD slope. (B) Bradycardia was measured over time (s) by the instantaneous frequency between two contiguous APs (in Hz) following membrane rupture. FRCRCFa (2  $\mu$ M) was included in the patch pipet. (C) FRCRCFa (2  $\mu$ M) significantly decreased the DD slope ( $***P = 0.0001$ ,  $n = 12$ ). (D) Example of a trace showing the spontaneous AP pattern of a cell, about 1 min following membrane rupture, where FRCRCFa (5  $\mu$ M) was included in the patch pipet. (E) FRCRCFa (5  $\mu$ M) significantly depolarized the MDP ( $**P = 0.0032$ ,  $n = 5$ ) in this subset of cells. (F) Spontaneous AP pattern of a hESC-CM recorded under current-clamp before (control, black trace) and following isomolar replacement of external  $\text{Na}^+$ -containing (140 mM NaCl) solution by  $\text{Li}^+$ -containing solution (140 mM LiCl) (green trace). This treatment leads to MDP depolarization and cessation of AP. This effect could be reversed upon washout with an external  $\text{Na}^+$ -containing solution (blue trace). This experiment was repeated five times and gave similar results ( $n = 5$ ).

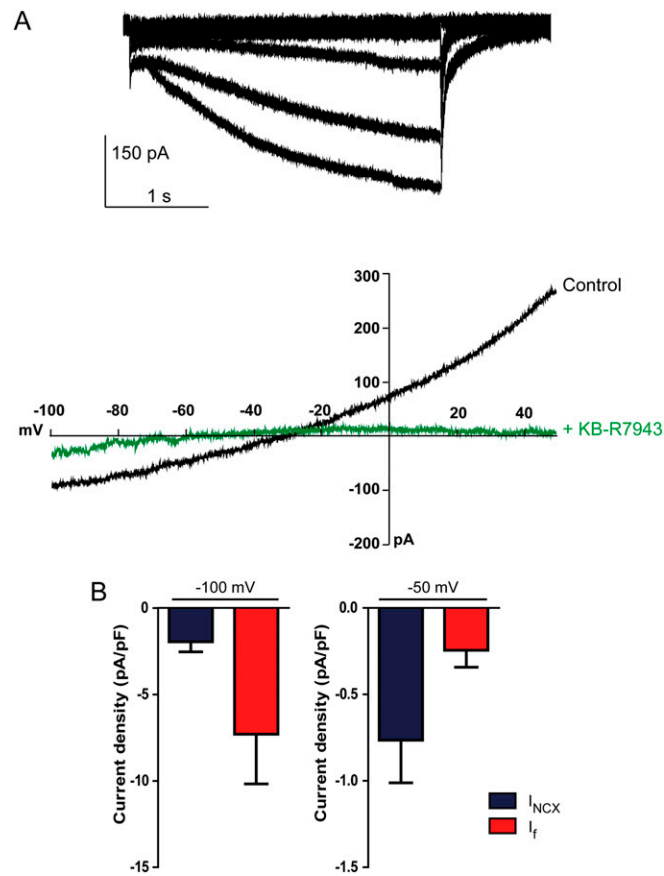

**Fig. S7.** Comparison of the  $I_f$  and  $I_{NCX}$  current densities in the same hESC-CMs. (A) Representative current traces of  $I_f$  (Upper) and of  $I_{NCX}$  current (Lower) recorded as described in Fig. S4. (B) The  $I_f$  and  $I_{NCX}$  current densities were determined at  $-100$  mV and  $-50$  mV and quantified as pA/pF ( $n = 5$ ).

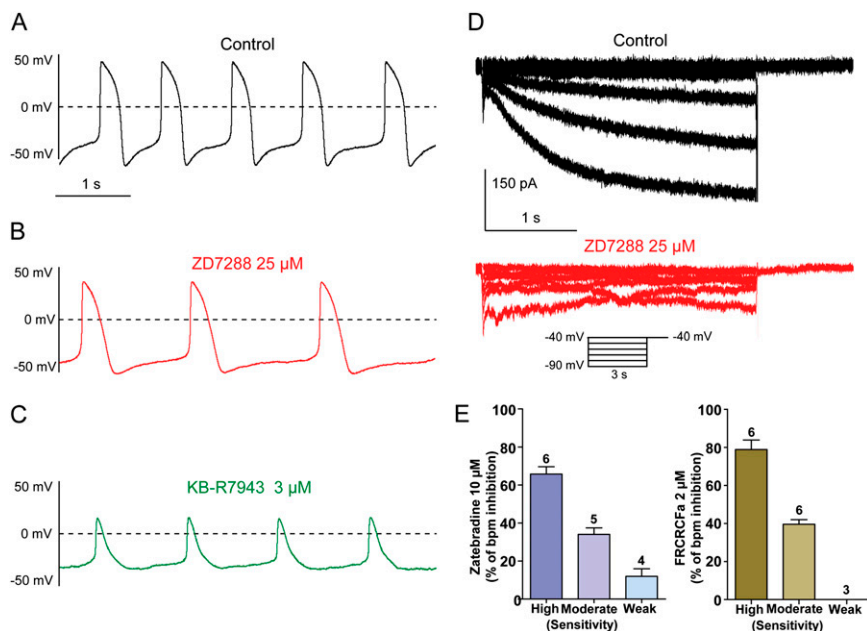

**Fig. S8.** hESC-CM displaying both  $I_f$ -dependent and  $I_f$ -independent pacemakers. (A–D) Combined current- and voltage-clamp recordings were performed in the same cell. (A) Spontaneous AP pattern of an hESC-CM recorded under current-clamp in control conditions (black trace). (B) Once  $I_f$  current inhibition by ZD7288 was monitored under voltage-clamp (see D), the AP pattern of the same cell was examined under current-clamp, during continuous ZD7288 exposure (red trace). Note the bradycardia and the notch suppression at early DD; however, no complete suppression of pacemaker activity was reached. (C) After ZD7288 washout, the same cell was exposed to 3 μM KB-R7943, which led to depression of the DD slope and the pacemaker (green trace). (D) The  $I_f$  current was recorded in the same cell, under voltage-clamp, in the absence (black traces) and presence of 25 μM ZD7288 (red traces) by stepping the membrane from a holding potential of –40 mV to –90 mV in 10-mV decrements for 3 s pulse duration. (E) One can distinguish three categories of cells responsive to zatebradine ( $I_f$ ) and FRCRFa (NCX), with respect to their inhibition of AP frequency; hESC-CMs highly (50–100% inhibition), moderately (25–50% inhibition), and weakly (0–25% inhibition) sensitive to zatebradine or FRCRFa. All three categories were significantly different from each other (ANOVA followed by Tukey's Multiple Comparison Test;  $P < 0.0001$ ). All drug-sensitive categories were significantly different from their control, except for the FRCRFa weakly-sensitive group ( $P < 0.05$ ).





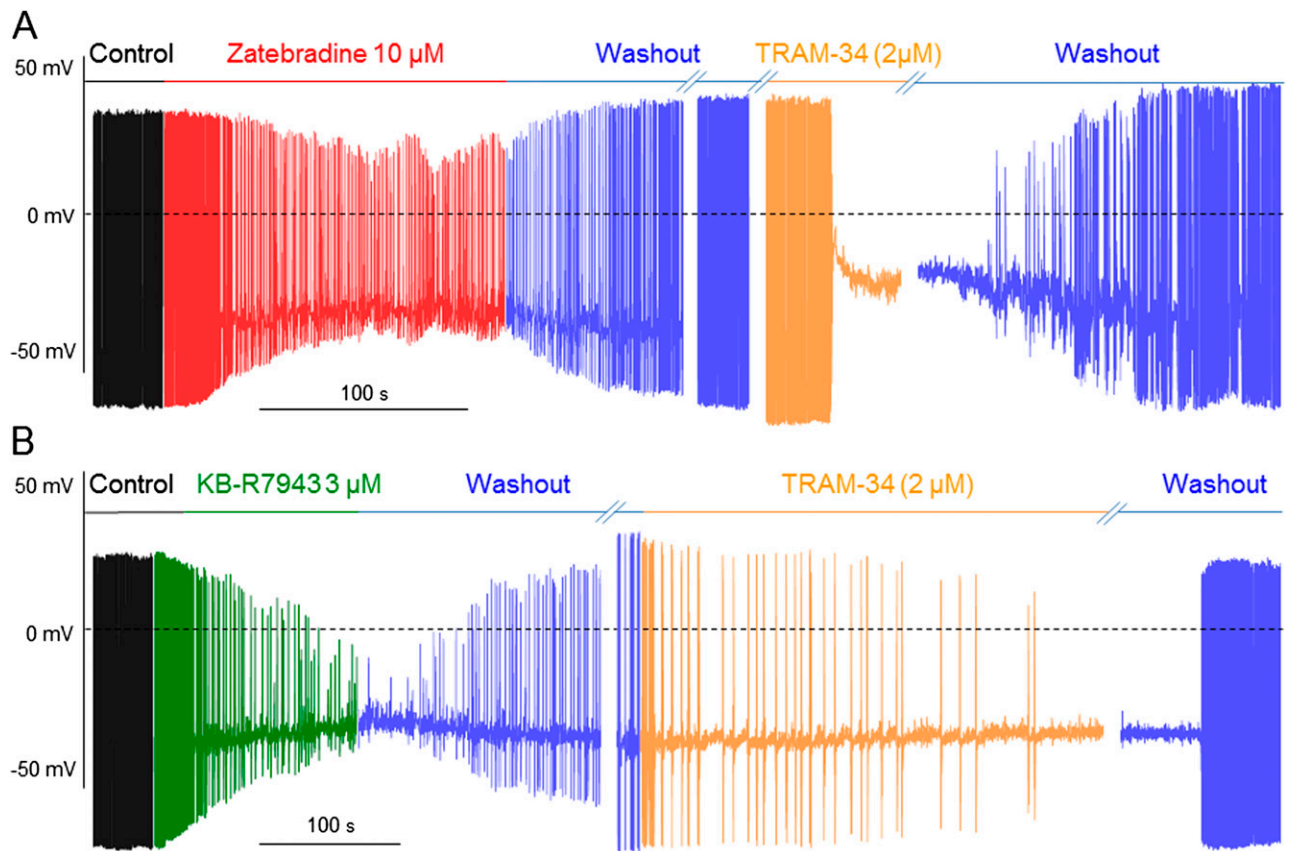

**Fig. 510.** TRAM 34 inhibits both  $I_f$ -dependent and  $I_f$ -independent pacemakers. (A) Representative spontaneous AP pattern of an hESC-CM with  $I_f$ -dependent pacemaker recorded in control conditions (black trace). Then, the same cell was treated with the  $I_f$  blocker zatebradine (10  $\mu$ M) (red trace). Note the bradycardia and the MDP depolarization. Subsequently, the cell was washed out (blue trace) and treated with TRAM 34 (2  $\mu$ M) (orange trace), which led to an abrupt cessation of AP that was reversible by washout (blue trace). (B) Representative spontaneous AP pattern of another hESC-CM with  $I_f$ -independent pacemaker recorded in control conditions (black trace). Then, the same cell was treated with the NCX blocker KB-R7943 (3  $\mu$ M) (green trace). Note the bradycardia and the MDP depolarization, which nearly caused a cessation of AP. Subsequently, the cell was washed out (blue trace) and treated with TRAM 34 (2  $\mu$ M) (orange trace), which led to a progressive bradycardia, MDP depolarization, and cessation of AP that was reversible by washout (blue trace).
